# Supplementary material for: Ag–thiolate interactions to enable an ultrasensitive and stretchable MXene strain sensor with high temporospatial resolution
Source: Springer Nature journal article supplement (doi:10.1038/s41467-024-49787-9), 2024-06-25
Supplement: 41467_2024_49787_MOESM4_ESM.pdf [file 41467_2024_49787_MOESM4_ESM.pdf]

## **Description of Additional Supplementary Files**

File Name: Supplementary Movie 1

Description: Real-time and dynamic display of the 3D pulse strength distribution measured by the 36-channel S-M/A1 strain sensor array.
